# Supplementary material for: The development of imin-based tandem Michael–Mannich cyclocondensation through a single-electron transfer (SET)/energy transfer (EnT) pathway in the use of methylene blue (MB+) as a photo-redox catalyst
Source: Royal Society of Chemistry journal article supplement (doi:10.1039/d2ra01190e), 2022-01-01
Supplement: d2ra01190e1.pdf [file d2ra01190e1.pdf]

## Supporting Information

**The development of imin-based tandem Michael-Mannich cyclocondensation through a single-electron transfer (SET)/energy transfer (EnT) pathway in the use of methylene blue (MB<sup>+</sup>) as a photo-redox catalyst**

Farzaneh Mohamadpour\*

School of Engineering, Apadana Institute of Higher Education, Shiraz, Iran

*\*Corresponding author. mohamadpour.f.7@gmail.com*

## Table of content

1. TON and TOF calculation method
2. Figures
  - 2.1. Fig. S1 The some of oxypyrrole rings are biologically active.
3. Tables
  - 3.1. Table S1 Optimization table of photocatalyst for the synthesis of **5a**
  - 3.2. Table S2 For the synthesis of **5a**, a table of solvent and visible-light optimization is provided
4. <sup>1</sup>HNMR, <sup>13</sup>CNMR, and mass data recorded for compounds
5. <sup>1</sup>HNMR, <sup>13</sup>CNMR, and mass files recorded for compounds

### 1. TON and TOF calculation method

TON=Yield/Amount of catalyst (mol), TOF=Yield/Time/Amount of catalyst (mol). The lower the amount of catalyst and the higher the yield, the higher the numerical value of the TON and TOF, and the higher the value, the more efficient the catalyst. For **5a**: TON=47.5 and TOF=1.9 and for **5b**: TON=46.5 and TOF=1.8 which is high compared to the other catalysts presented in Table 3. Given that the purpose of this study was to increase the yield, reduce the reaction rate and use the minimum amount of catalyst.

## 2. Figures

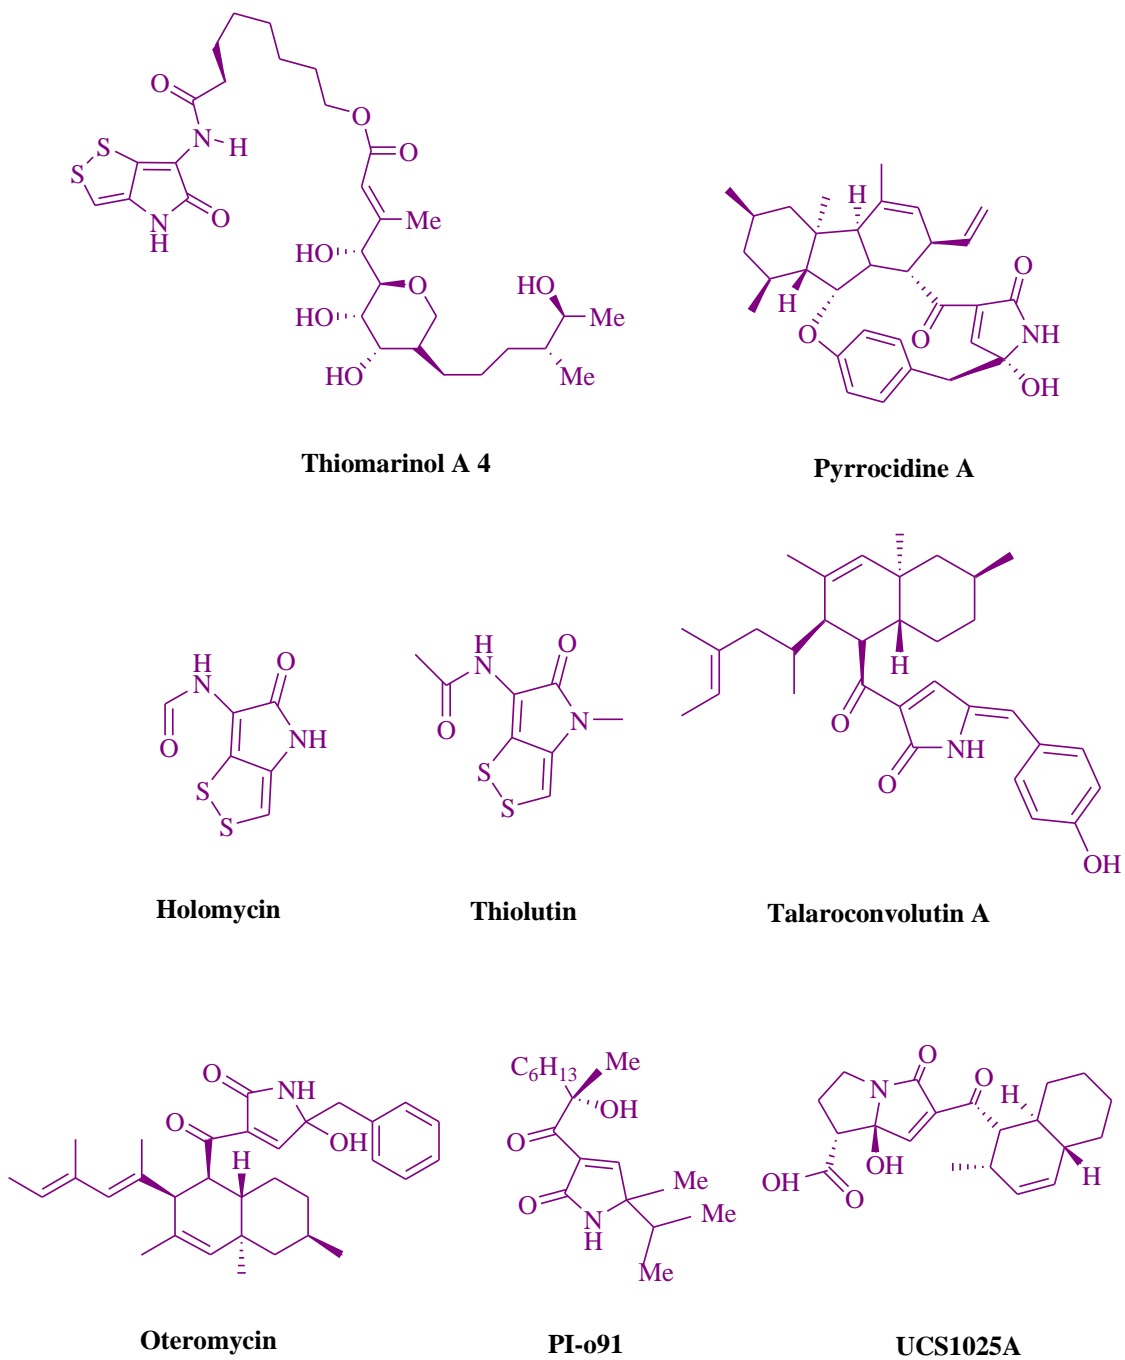

**Fig. S1** The some of oxypyrrole rings are biologically active.

### 3. Tables

**Table S1** Optimization table of photocatalyst for the synthesis of **5a**<sup>a</sup>

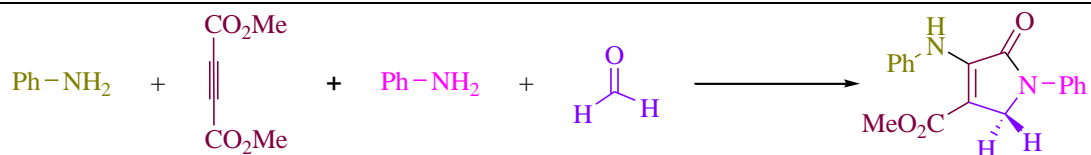

| Entry | Photocatalyst                | Solvent (3 mL) | Time (min) | Isolated Yields (%) |
|-------|------------------------------|----------------|------------|---------------------|
| 1     | Methylene blue (2.5 mol%)    | EtOH           | 25         | 95                  |
| 2     | Erythrosin B (2 mol%)        | EtOH           | 25         | 71                  |
| 3     | Acenaphthenequinone (2 mol%) | EtOH           | 25         | 52                  |
| 4     | Rhodamine B (2 mol%)         | EtOH           | 25         | 68                  |
| 5     | Alizarin (2 mol%)            | EtOH           | 25         | 46                  |
| 6     | Riboflavin (2 mol%)          | EtOH           | 25         | 65                  |
| 7     | Fluorescein (2 mol%)         | EtOH           | 25         | 72                  |
| 8     | Xanthene (2 mol%)            | EtOH           | 25         | 56                  |
| 9     | Rose bengal (2 mol%)         | EtOH           | 25         | 77                  |

|    |                                    |      |    |    |
|----|------------------------------------|------|----|----|
| 10 | Phenanthrenequinone (2 mol%)       | EtOH | 25 | 49 |
| 11 | 9 <i>H</i> -Xanthen-9-one (2 mol%) | EtOH | 25 | 58 |

<sup>a</sup>Reaction conditions: EtOH (3 mL), blue LED (18 W), and different photocatalysts at room temperature, formaldehyde (1.5 mmol), aniline (2 mmol), and dimethyl acetylenedicarboxylate (DMAD) (1 mmol).

**Table S2** For the synthesis of **5a**, a table of solvent and visible-light optimization is provided<sup>a</sup>

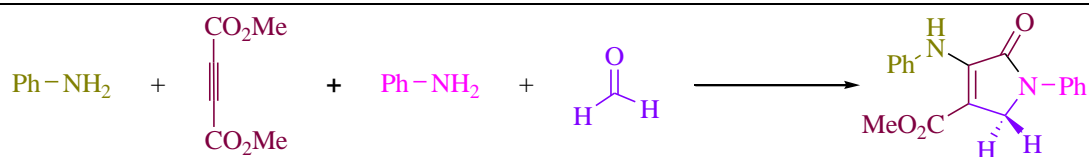

| Entry    | Light Source             | Solvent (3 mL)     | Time (min) | Isolated Yields (%) |
|----------|--------------------------|--------------------|------------|---------------------|
| 1        | Blue light (18 W)        | CH <sub>3</sub> CN | 25         | 78                  |
| 2        | Blue light (18 W)        | MeOH               | 25         | 84                  |
| <b>3</b> | <b>Blue light (18 W)</b> | <b>EtOH</b>        | <b>25</b>  | <b>95</b>           |
| 4        | Blue light (18 W)        | —                  | 30         | 76                  |
| 5        | Blue light (18 W)        | EtOAc              | 25         | 72                  |
| 6        | Blue light (18 W)        | DMF                | 40         | 16                  |
| 7        | Blue light (18 W)        | DMSO               | 40         | 23                  |

|    |                    |                  |    |       |
|----|--------------------|------------------|----|-------|
| 8  | Blue light (18 W)  | H <sub>2</sub> O | 30 | 61    |
| 9  | Blue light (18 W)  | THF              | 40 | 13    |
| 10 | Blue light (18 W)  | Toluene          | 35 | 37    |
| 11 | White light (18 W) | EtOH             | 25 | 90    |
| 12 | Green light (18 W) | EtOH             | 25 | 82    |
| 13 | —                  | EtOH             | 35 | trace |
| 14 | Blue light (10 W)  | EtOH             | 25 | 74    |
| 15 | Blue light (12 W)  | EtOH             | 25 | 82    |
| 16 | Blue light (20 W)  | EtOH             | 25 | 95    |

---

<sup>a</sup>Reaction conditions: At room temperature, formaldehyde (1.5 mmol), aniline (2 mmol), and dimethyl acetylenedicarboxylate (DMAD) (1 mmol), MB<sup>+</sup> (2 mol%).

#### 4. $^1\text{H}$ NMR, $^{13}\text{C}$ NMR, and mass data recorded for compounds

##### *Ethyl 1-phenyl-3-(phenylamino)-2,5-dihydro-2-oxo-1Hpyrrole-4-carboxylate (5b)*

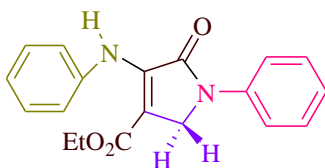

Yield: 93%; m.p. 139-141 °C;  $^1\text{H}$ NMR (300 MHz,  $\text{CDCl}_3$ ): 1.23 (3H, t,  $J= 9.6$  Hz,  $\text{OCH}_2\text{CH}_3$ ), 4.24 (2H, q,  $J= 9.6$  Hz,  $\text{OCH}_2\text{CH}_3$ ), 4.58 (2H, s,  $\text{CH}_2\text{-N}$ ), 7.16–7.25 (4H, m, ArH), 7.29-7.37 (2H, m, ArH), 7.40-7.46 (2H, m, ArH), 7.84 (2H, d,  $J= 11.6$  Hz, ArH), 8.01 (1H, s, NH) ppm.

##### *Methyl 4-(4-methylphenylamino)-1-(4-methylphenyl)-2,5-dihydro-5-oxo-1H-pyrrole-3-carboxylate (5c)*

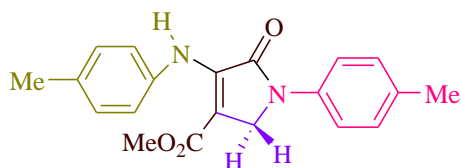

Yield: 97%; m.p. 179-181 °C;  $^1\text{H}$ NMR (400 MHz,  $\text{CDCl}_3$ ): 2.36 (6H, s, 2 $\text{CH}_3$ ), 3.77 (3H, s,  $\text{OCH}_3$ ), 4.52 (2H, s,  $\text{CH}_2\text{-N}$ ), 7.06 (2H, d,  $J=8.4$  Hz, ArH), 7.14 (2H, d,  $J=8.4$  Hz, ArH), 7.21 (2H, d,  $J=8.4$  Hz, ArH), 7.68 (2H, d,  $J=8.8$  Hz, ArH), 8.03 (1H, s, NH) ppm.

***Ethyl 4-(4-methylphenylamino)-1-(4-methylphenyl)-2,5-dihydro-5-oxo-1H-pyrrole-3-carboxylate (5d)***

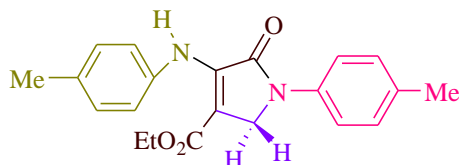

Yield: 96%; m.p. 132-134 °C; <sup>1</sup>HNMR (400 MHz, CDCl<sub>3</sub>): 1.25 (3H, t, *J*=7.2 Hz, CH<sub>2</sub>CH<sub>3</sub>), 2.37 (6H, s, 2CH<sub>3</sub>), 4.23 (2H, q, *J*=7.2 Hz, 2CH<sub>2</sub>CH<sub>3</sub>), 4.53 (2H, s, CH<sub>2</sub>-N), 7.06 (2H, d, *J*=8.4 Hz, ArH), 7.14 (2H, d, *J*=8.4 Hz, ArH), 7.21 (2H, d, *J*=8.4 Hz, ArH), 7.68 (2H, d, *J*=8.4 Hz, ArH), 8.01 (1H, s, NH) ppm.

***Methyl 3-(benzylamino)-1-(4-fluorophenyl)-2,5-dihydro-2-oxo-1H-pyrrole-4-carboxylate (5e)***

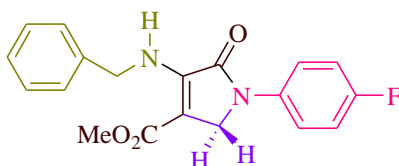

Yield: 91%; m.p. 167-169 °C; <sup>1</sup>HNMR (300 MHz, CDCl<sub>3</sub>): 3.81 (s, 3H, OCH<sub>3</sub>), 4.44 (s, 2H, CH<sub>2</sub>-N), 5.14 (d, 2H, *J*= 8.8 Hz, CH<sub>2</sub>-NH), 6.90 (br s, 1H, NH), 7.09–7.15 (m, 2H, ArH), 7.29–7.38 (m, 5H, ArH), 7.72–7.77 (m, 2H, ArH) ppm.

***Methyl 3-(benzylamino)-1-(4-bromophenyl)-2,5-dihydro-2-oxo-1H-pyrrole-4-carboxylate (5f)***

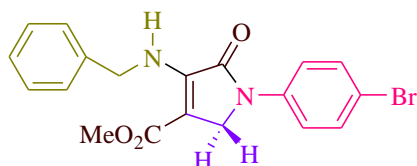



Yield: 88%; m.p. 120-122 °C; <sup>1</sup>HNMR (300 MHz, CDCl<sub>3</sub>): 3.81 (3H, s, OCH<sub>3</sub>), 4.43 (2H, s, CH<sub>2</sub>-N), 5.13 (2H, d, *J*= 8.8 Hz, CH<sub>2</sub>-NH), 6.87 (1H, br s, NH), 7.29–7.38 (5H, m, ArH), 7.51–7.55 (2H, m, ArH), 7.68–7.73 (2H, m, ArH) ppm.

***Methyl-4-(4-fluorophenylamino)-1-(4-fluorophenyl)-2,5-dihydro-5-oxo-1H-pyrrole-3-carboxylate (5g)***

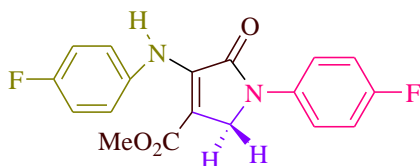

Yield: 96%; m.p. 159-161 °C; <sup>1</sup>HNMR (400 MHz, CDCl<sub>3</sub>): 3.79 (3H, s, OCH<sub>3</sub>), 4.52 (2H, s, CH<sub>2</sub>-N), 7.04 (2H, t, *J*=8.4 Hz, ArH), 7.08-7.16 (4H, m, ArH), 7.73-7.76 (2H, m, ArH), 8.05 (1H, s, NH) ppm.

***Ethyl-4-(4-fluorophenylamino)-1-(4-fluorophenyl)-2,5-dihydro-5-oxo-1H-pyrrole-3-carboxylate (5h)***

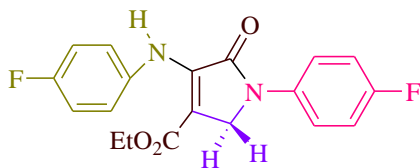

Yield: 98%; m.p. 172-174 °C; <sup>1</sup>HNMR (300 MHz, CDCl<sub>3</sub>): 1.29 (3H, t, *J*= 9.2 Hz, OCH<sub>2</sub>CH<sub>3</sub>), 4.27 (2H, q, *J*= 9.6 Hz, OCH<sub>2</sub>CH<sub>3</sub>), 4.53 (2H, s, CH<sub>2</sub>-N), 7.01-7.17 (5H, m, ArH), 7.72–7.79 (2H, m, ArH), 8.05 (1H, s, NH) ppm.

***Methyl 4-(4-bromophenylamino)-1-(4-bromophenyl)-2,5-dihydro-5-oxo-1H-pyrrole-3-carboxylate (5i)***

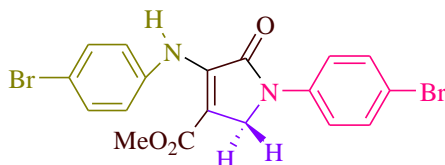

Yield: 83%; m.p. 180-182 °C; <sup>1</sup>HNMR (300 MHz, CDCl<sub>3</sub>): 3.81 (3H, s, OCH<sub>3</sub>), 4.52 (2H, s, CH<sub>2</sub>-N), 7.04 (2H, d, *J*= 11.2 Hz, ArH), 7.46 (2H, d, *J*= 11.6 Hz, ArH), 7.53 (2H, d, *J*= 12.0 Hz, ArH), 7.71 (2H, d, *J*= 12.0 Hz, ArH), 8.06 (1H, s, NH) ppm.

***Ethyl 3-(4-bromophenylamino)-1-(4-bromophenyl)-2,5-dihydro-2-oxo-1H-pyrrole-4-carboxylate (5j)***

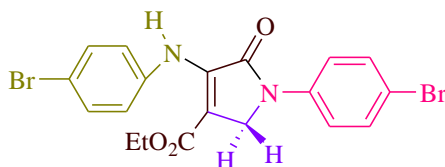

Yield: 86%; m.p. 167-169 °C; <sup>1</sup>HNMR (300 MHz, CDCl<sub>3</sub>): 1.29 (3H, t, *J*= 9.6 Hz, OCH<sub>2</sub>CH<sub>3</sub>), 4.28 (2H, q, *J*= 9.6 Hz, OCH<sub>2</sub>CH<sub>3</sub>), 4.53 (2H, s, CH<sub>2</sub>-N), 7.04 (2H, d, *J*= 11.6 Hz, ArH), 7.45 (2H, d, *J*= 11.2 Hz, ArH), 7.53 (2H, d, *J*= 12.0 Hz, ArH), 7.72 (2H, d, *J*= 11.6 Hz, ArH), 8.05 (1H, s, NH) ppm.

***Methyl 4-(4-ethylphenylamino)-1-(4-ethylphenyl)-2,5-dihydro-5-oxo-1H-pyrrole-3-carboxylate (5k)***

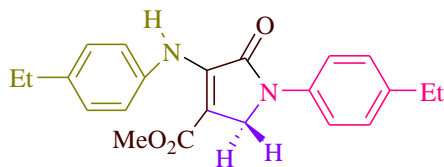

Yield: 91%; m.p. 122-124 °C;  $^1\text{H}$ NMR (400 MHz,  $\text{CDCl}_3$ ): 1.26 (6H, t,  $J=2.4$  Hz,  $2\text{CH}_2\text{CH}_3$ ), 2.67 (4H, q,  $J=7.2$  Hz,  $2\text{CH}_2\text{CH}_3$ ), 3.76 (3H, s,  $2\text{OCH}_3$ ), 4.53 (2H, s,  $\text{CH}_2\text{-N}$ ), 7.09 (2H, d,  $J=8.4$  Hz, ArH), 7.17 (2H, d,  $J=8.4$  Hz, ArH), 7.24 (2H, d,  $J=8.8$  Hz, ArH), 7.70 (2H, d,  $J=8.8$  Hz, ArH), 8.05 (1H, s, NH) ppm;  $^{13}\text{C}$ NMR (100 MHz,  $\text{CDCl}_3$ ): 15.6, 15.7 ( $2\text{CH}_2\text{-CH}_3$ ), 28.3 and 28.4 ( $2\text{CH}_2\text{-CH}_3$ ), 48.3 ( $\text{CH}_2\text{N}$ ), 51.3 ( $\text{OCH}_3$ ), 101.9, 119.4, 123.1, 127.8, 128.5, 136.1, 136.4, 140.8, 141.3, 143.6 ( $\text{C}_{\text{Ar}}$ ), 163.6 ( $\text{C=O}$ , amide), 165.1 ( $\text{C=O}$ , ester); MS (EI) m/z (%): 364 (M, 59), 349 (1), 332 (10), 318 (4), 305 (100), 290 (1), 277 (7), 261 (4), 247 (2), 233 (2), 216 (13), 199 (2), 186 (1), 173 (14), 158 (12), 145 (3), 132 (18), 118 (10), 103 (12), 90 (8), 77 (21), 64 (2), 51 (4).

***Ethyl 4-(4-ethylphenylamino)-1-(4-ethylphenyl)-2,5-dihydro-5-oxo-1H-pyrrole-3-carboxylate***  
(5l)

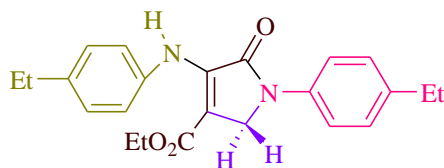

Yield: 93%; m.p. 101-103 °C;  $^1\text{H}$ NMR (400 MHz,  $\text{CDCl}_3$ ): 1.24 (9H, m,  $3\text{CH}_2\text{CH}_3$ ), 2.67 (4H, q,  $J=7.2$  Hz,  $2\text{CH}_2\text{CH}_3$ ), 4.22 (2H, q,  $J=7.2$  Hz,  $\text{CH}_2\text{CH}_3$ ), 4.54 (2H, s,  $\text{CH}_2\text{-N}$ ), 7.09 (2H, d,  $J=8.4$  Hz, ArH), 7.16 (2H, d,  $J=8.4$  Hz, ArH), 7.24 (2H, d,  $J=8.4$  Hz, ArH), 7.71 (2H, d,  $J=8.8$  Hz, ArH), 8.01 (1H, s, NH) ppm;  $^{13}\text{C}$ NMR (100 MHz,  $\text{CDCl}_3$ ): 14.2, 15.6 and 15.7 ( $3\text{CH}_2\text{-CH}_3$ ), 28.3 and 28.4 ( $2\text{CH}_2\text{-CH}_3$ ), 48.4 ( $\text{CH}_2\text{N}$ ), 60.3 ( $\text{OCH}_2\text{-CH}_3$ ), 102.5, 119.5, 122.8, 127.8, 128.7,

136.3, 136.4, 140.7, 141.3 and 143.1 (C<sub>Ar</sub>), 163.6 (C=O, amide), 164.8 (C=O, ester); MS (EI) m/z (%): 378 (M, 2), 357 (2), 339 (3), 321 (4), 305 (5), 292 (7), 275 (4), 262 (7), 239 (12), 218 (5), 199 (11), 185 (5), 171 (8), 152 (10), 130 (25), 105 (35), 91 (93), 77 (57), 57 (56), 43 (100).

***Methyl 3-(benzylamino)-1-phenyl-2,5-dihydro-2-oxo-1H-pyrrole-4-carboxylate (5m)***

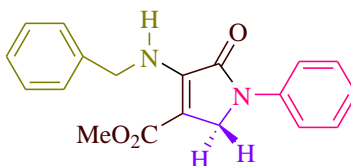

Yield: 92%; m.p. 138-140 °C; <sup>1</sup>HNMR (300 MHz, CDCl<sub>3</sub>): 3.81 (3H, s, OCH<sub>3</sub>), 4.47 (2H, s, CH<sub>2</sub>-N), 5.15 (2H, d, *J*= 8.8 Hz, CH<sub>2</sub>-NH), 6.86 (1H, br, NH), 7.20–7.47 (8H, m, ArH), 7.79 (2H, d, *J*= 10.0 Hz, ArH) ppm.

***Ethyl 3-(benzylamino)-1-phenyl-2,5-dihydro-2-oxo-1Hpyrrole-4-carboxylate (5n)***

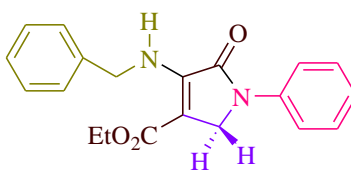

Yield: 89%; m.p. 131-133 °C; <sup>1</sup>HNMR (300 MHz, CDCl<sub>3</sub>): 1.35 (3H, t, *J*= 9.6 Hz, OCH<sub>2</sub>CH<sub>3</sub>), 4.28 (2H, q, *J*= 9.6 Hz, OCH<sub>2</sub>CH<sub>3</sub>), 4.47 (2H, s, CH<sub>2</sub>-N), 5.15 (2H, d, *J*= 8.8 Hz, CH<sub>2</sub>-NH), 6.85 (1H, br, NH), 7.25–7.46 (8H, m, ArH), 7.80 (2H, d, *J*= 9.6 Hz, ArH) ppm.

***Methyl 3-(butylamino)-2,5-dihydro-2-oxo-1-phenyl-1Hpyrrole-4-carboxylate (5o)***

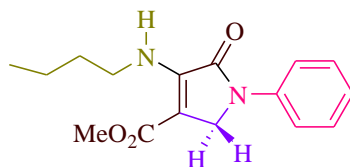

Yield: 95%; m.p. 57-59 °C; <sup>1</sup>HNMR (300 MHz, CDCl<sub>3</sub>): 0.98 (3H, t, *J* = 9.6 Hz, CH<sub>3</sub>), 1.42 (2H, sextet, *J* = 9.2 Hz, CH<sub>2</sub>), 1.64 (2H, quintet, *J* = 9.0 Hz, CH<sub>2</sub>), 3.82 (3H, s, OCH<sub>3</sub>), 3.89 (2H, t, *J* = 9.2 Hz, CH<sub>2</sub>-NH), 4.44 (2H, s, CH<sub>2</sub>-N), 6.67 (1H, br s, NH), 7.19-7.24 (1H, m, ArH), 7.40-7.45 (2H, m, ArH), 7.79 (2H, d, *J* = 10.4 Hz, ArH) ppm.

***Ethyl 1-(4-bromophenyl)-3-(butylamino)-2,5-dihydro-2-oxo-1H-pyrrole-4-carboxylate (5p)***

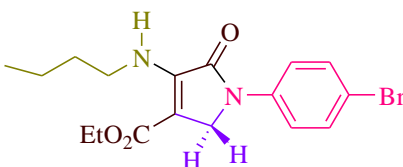

Yield: 86%; m.p. 97-99 °C; <sup>1</sup>HNMR (400 MHz, CDCl<sub>3</sub>): 0.97 (3H, t, *J* = 7.2 Hz, CH<sub>3</sub>), 1.35 (3H, t, *J* = 7.2 Hz, OCH<sub>2</sub>CH<sub>3</sub>), 1.43 (2H, sextet, *J* = 7.6 Hz, CH<sub>2</sub>), 1.61 (2H, quintet, *J* = 7.6 Hz, CH<sub>2</sub>), 3.87 (2H, t, *J* = 7.2 Hz, CH<sub>2</sub>-NH), 4.28 (2H, q, *J* = 7.2 Hz, OCH<sub>2</sub>CH<sub>3</sub>), 4.40 (2H, s, CH<sub>2</sub>-N), 6.72 (1H, br s, NH), 7.52 (2H, d, *J* = 8.8 Hz, ArH), 7.70 (2H, d, *J* = 8.8 Hz, ArH) ppm.

***Methyl 4-(4-methoxyphenylamino)-1-(4-methoxyphenyl)-2,5-dihydro-5-oxo-1H-pyrrole-3-carboxylate (5q)***

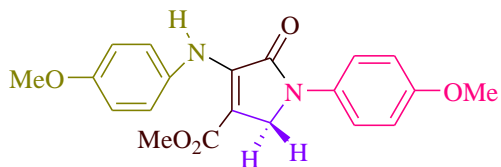

Yield: 94%; m.p. 172-174 °C;  $^1\text{H}$ NMR (400 MHz,  $\text{CDCl}_3$ ): 3.77 (3H, s,  $\text{CH}_3$ ), 3.83 (6H, s,  $2\text{OCH}_3$ ), 4.50 (2H, s,  $\text{CH}_2\text{-N}$ ), 6.89 (4H, d,  $J=17.6$  Hz, ArH), 7.13 (1H, s, ArH), 7.68 (1H, s, ArH), 8.03 (1H, s, NH) ppm.

***Ethyl 4-(4-methoxyphenylamino)-1-(4-methoxyphenyl)-2,5-dihydro-5-oxo-1H-pyrrole-3-carboxylate (5r)***

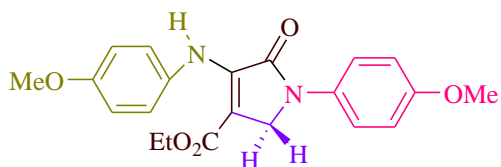

Yield: 92%; m.p. 154-156 °C;  $^1\text{H}$ NMR (400 MHz,  $\text{CDCl}_3$ ): 1.26 (3H, t,  $J=7.2$  Hz,  $\text{CH}_2\text{CH}_3$ ), 3.83 (6H, s,  $2\text{OCH}_3$ ), 4.23 (2H, q,  $J=7.2$  Hz,  $\text{CH}_2\text{CH}_3$ ), 4.50 (2H, s,  $\text{CH}_2\text{-N}$ ), 6.87 (2H, d,  $J=8.8$  Hz, ArH), 6.93 (2H, d,  $J=8.8$  Hz, ArH), 7.12 (2H, d,  $J=8.8$  Hz, ArH), 7.69 (2H, d,  $J=8.8$  Hz, ArH), 8.02 (1H, s, NH) ppm.

***Methyl 1-(3,4-dichlorophenyl)-3-(butylamino)-2,5-dihydro-2-oxo-1H-pyrrole-4-carboxylate (5s)***

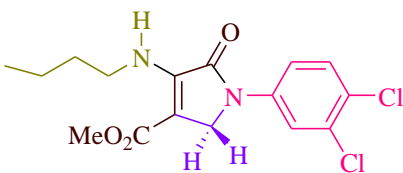

Yield: 87%; m.p. 98-100 °C; <sup>1</sup>HNMR (300 MHz, CDCl<sub>3</sub>): 0.98 (3H, t, *J*= 9.6 Hz, CH<sub>3</sub>), 1.46 (2H, sextet, *J*= 10.4 Hz, CH<sub>2</sub>), 1.62 (2H, quintet, *J*= 10.0 Hz, CH<sub>2</sub>), 3.82 (3H, s, OCH<sub>3</sub>), 3.89 (2H, t, *J*= 9.2 Hz, CH<sub>2</sub>-NH), 4.40 (2H, s, CH<sub>2</sub>-N), 6.69 (1H, br s, NH), 7.45-7.48 (1H, m, ArH), 7.66-7.70 (1H, m, ArH), 8.01 (1H, s, ArH) ppm.

5.  $^1\text{H}$ NMR,  $^{13}\text{C}$ NMR, and mass files recorded for compounds

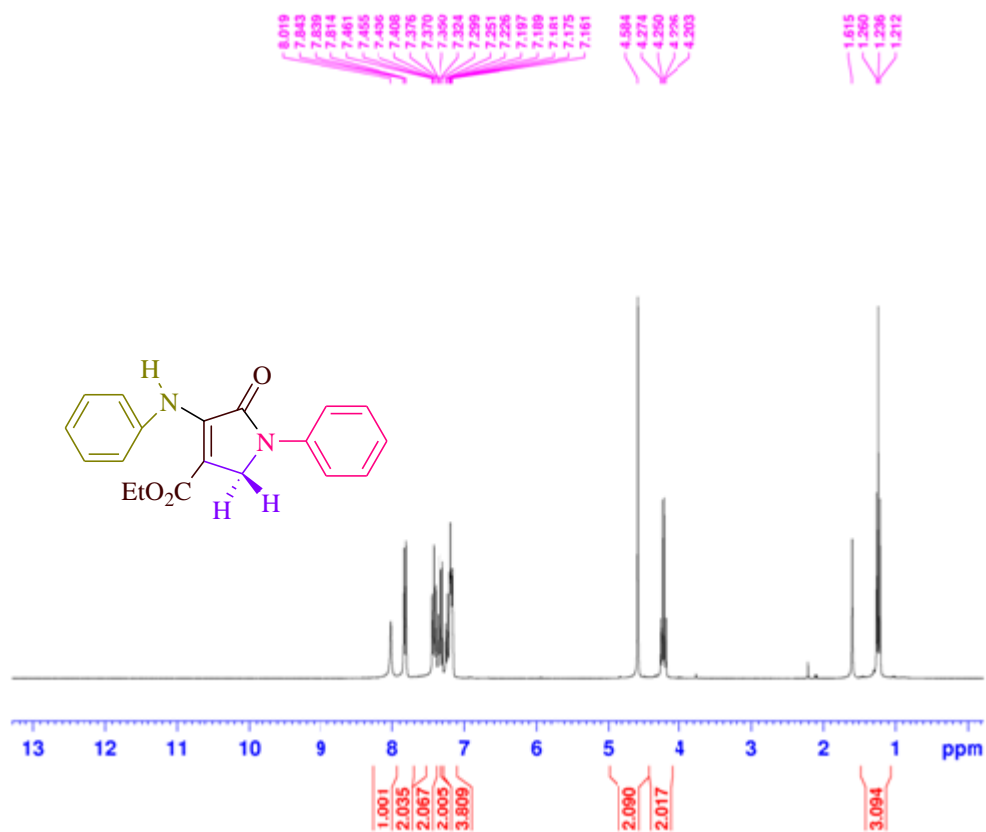

Fig. S2  $^1\text{H}$ NMR Spectrum of compound (300 MHz,  $\text{CDCl}_3$ ) of **5b**



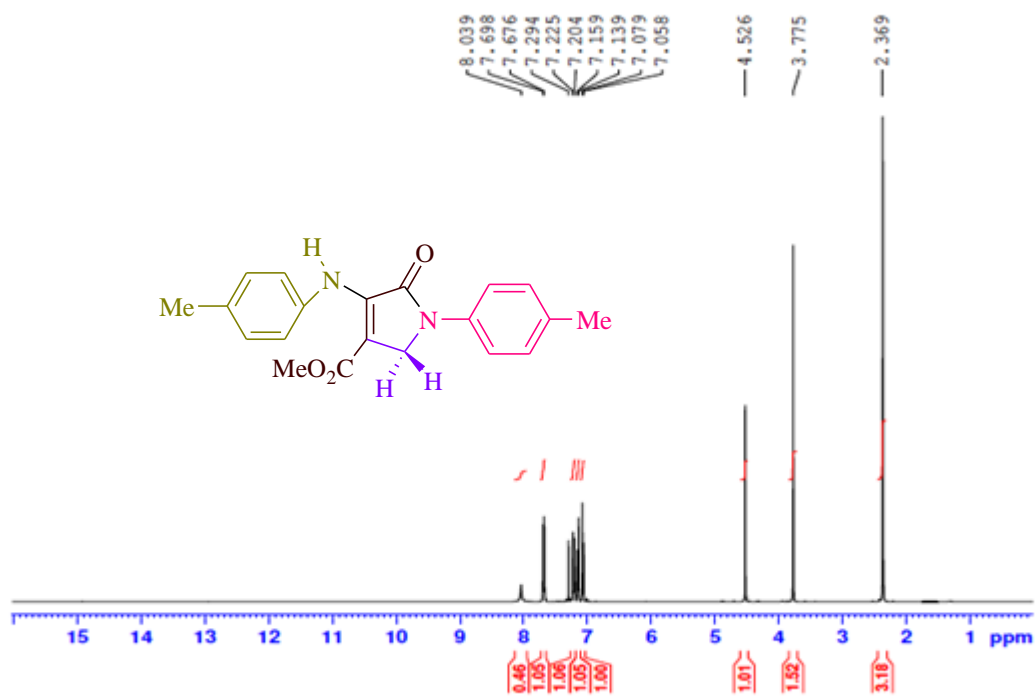

**Fig. S3** <sup>1</sup>H NMR Spectrum of compound (400 MHz, CDCl<sub>3</sub>) of **5c**

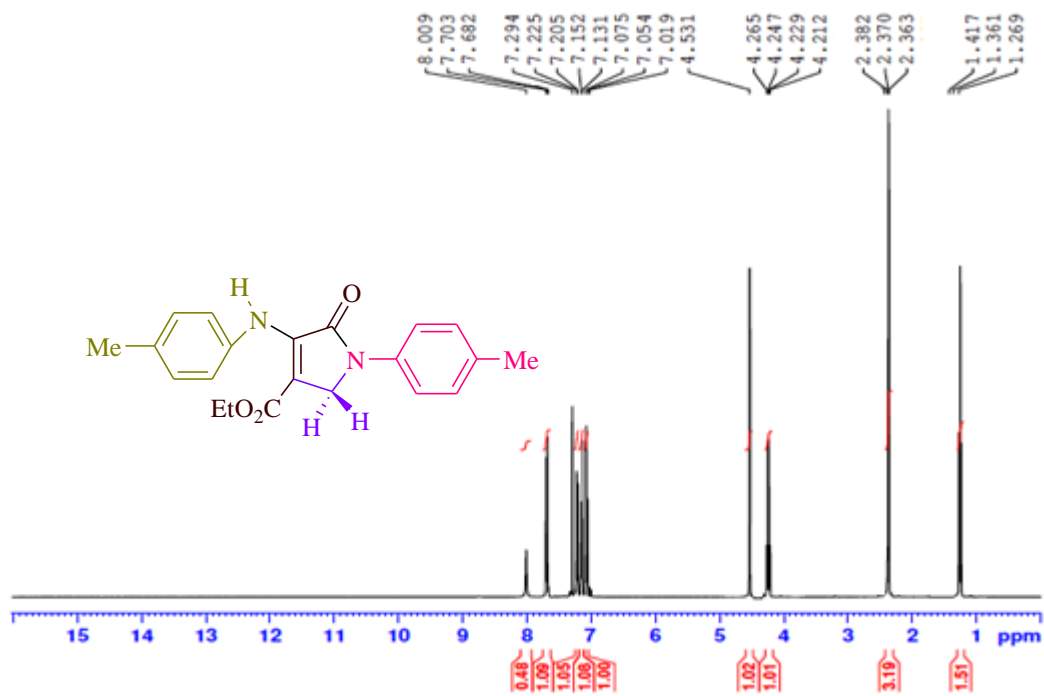

**Fig. S4** <sup>1</sup>H NMR Spectrum of compound (400 MHz, CDCl<sub>3</sub>) of **5d**

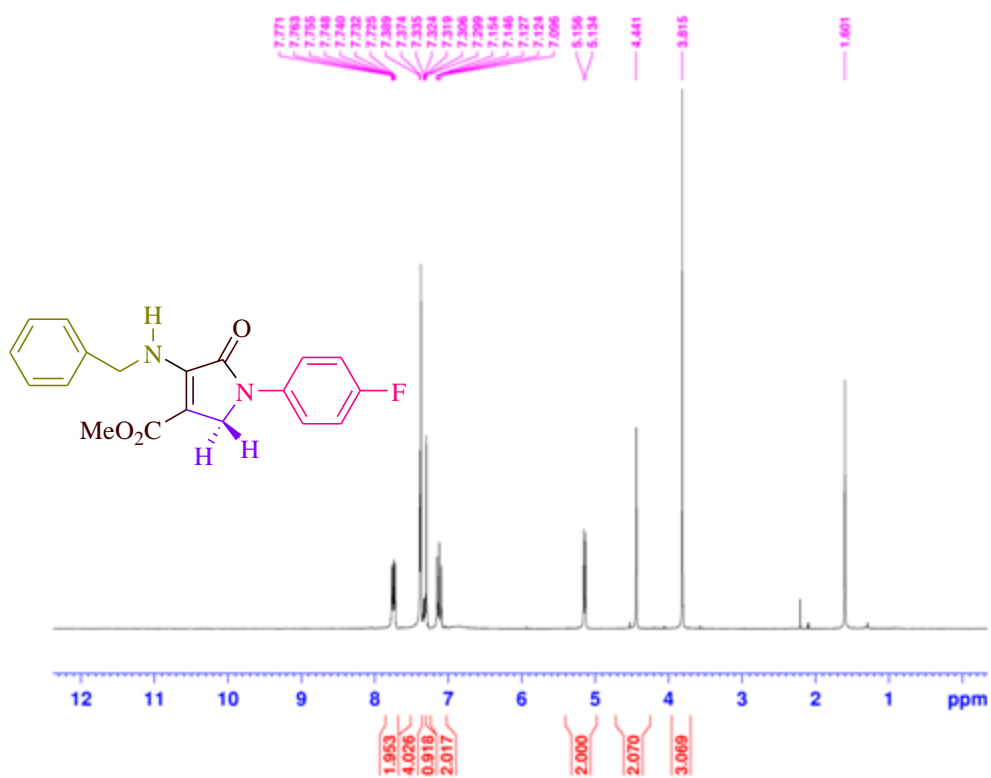

**Fig. S5** <sup>1</sup>H NMR Spectrum of compound (300 MHz, CDCl<sub>3</sub>) of **5e**

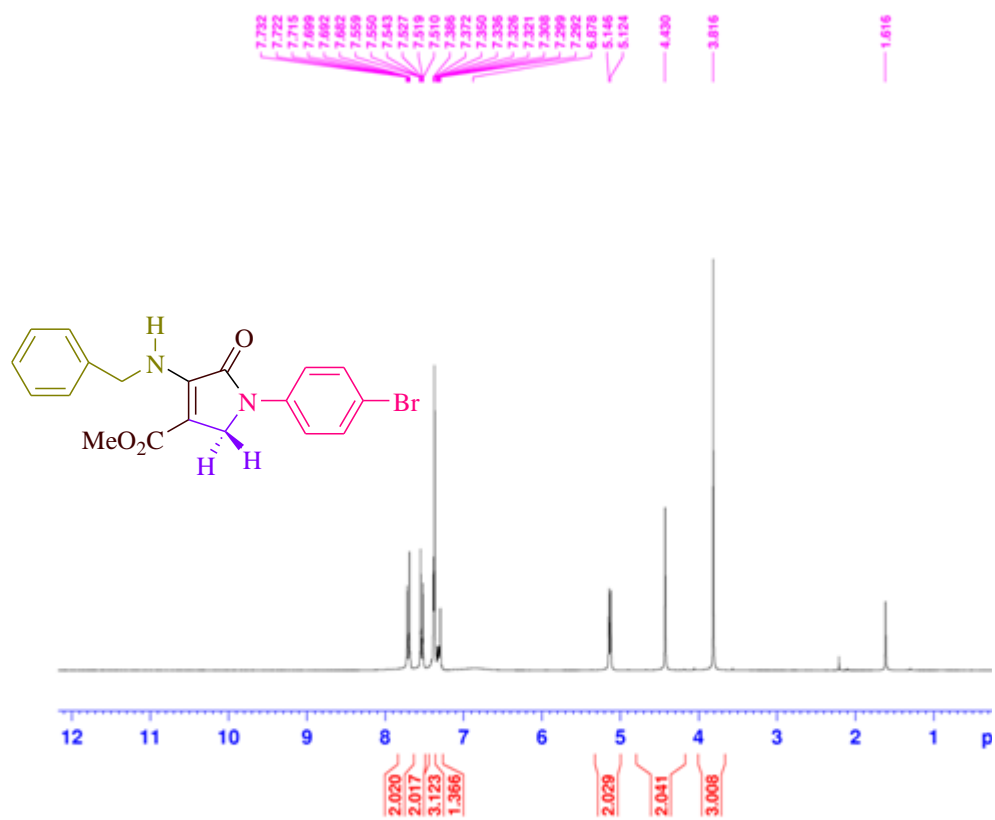

**Fig. S6** <sup>1</sup>H NMR Spectrum of compound (300 MHz, CDCl<sub>3</sub>) of **5f**

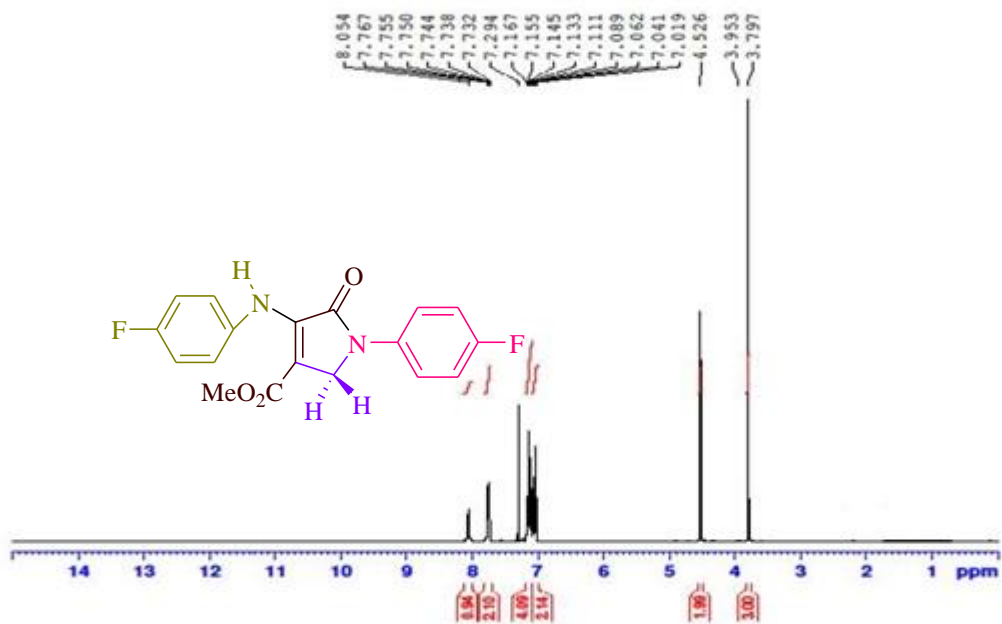

**Fig. S7** <sup>1</sup>H NMR Spectrum of compound (400 MHz, CDCl<sub>3</sub>) of **5g**

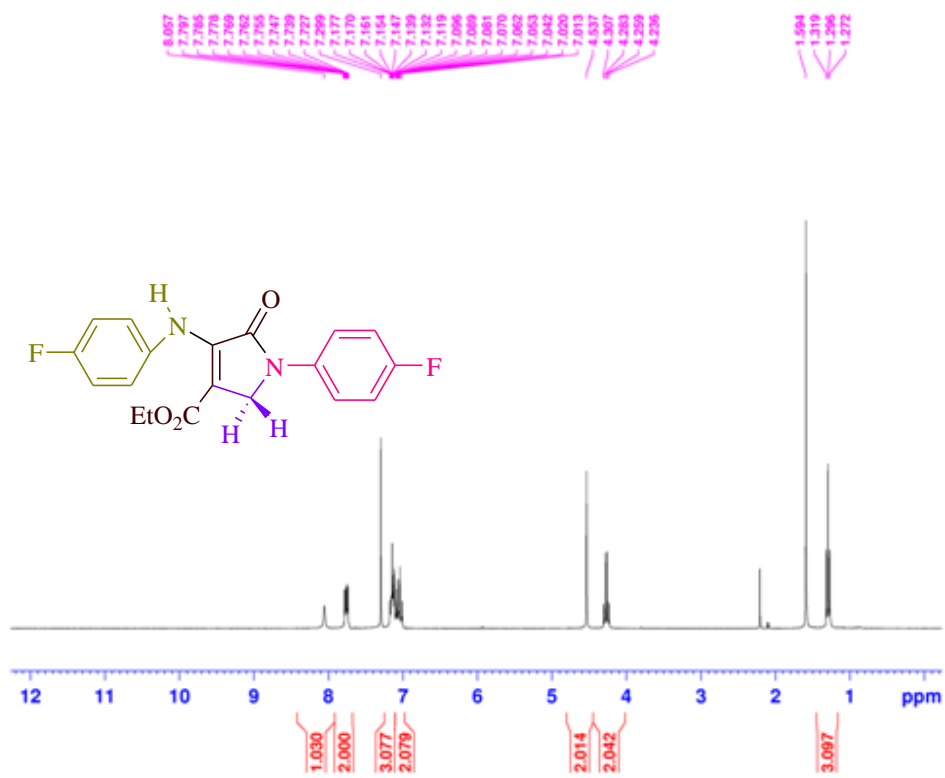

Fig. S8  $^1\text{H}$ NMR Spectrum of compound (300 MHz,  $\text{CDCl}_3$ ) of **5h**

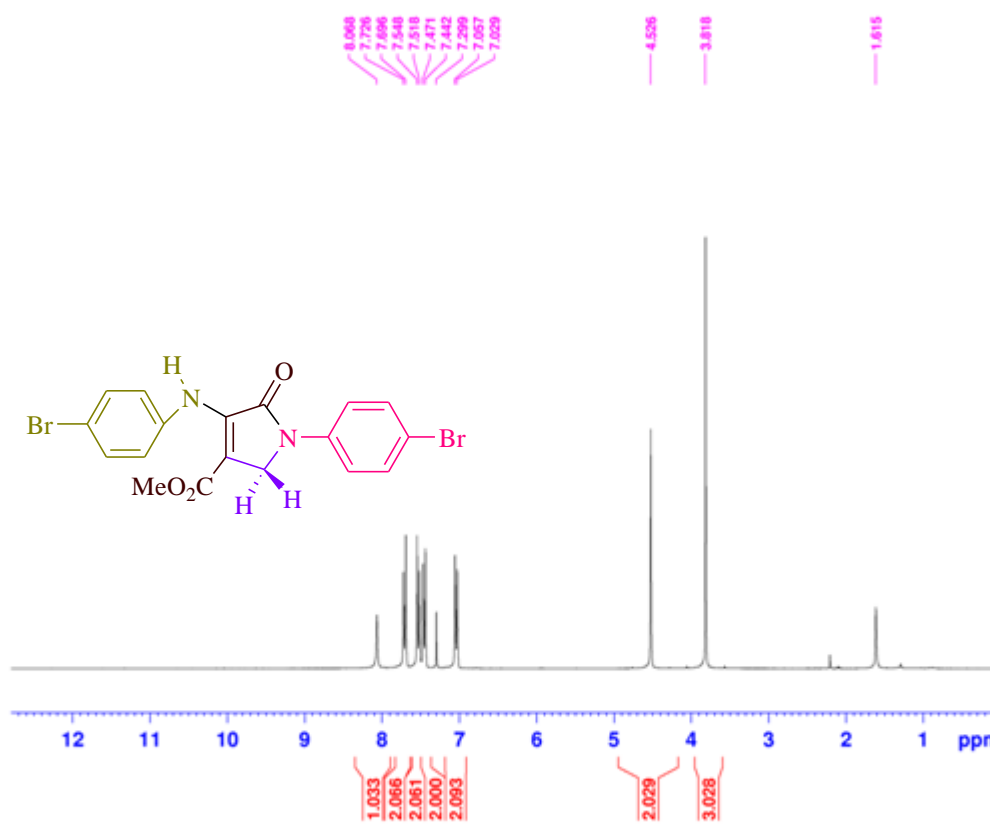

**Fig. S9** <sup>1</sup>HNMR Spectrum of compound (300 MHz, CDCl<sub>3</sub>) of **5i**

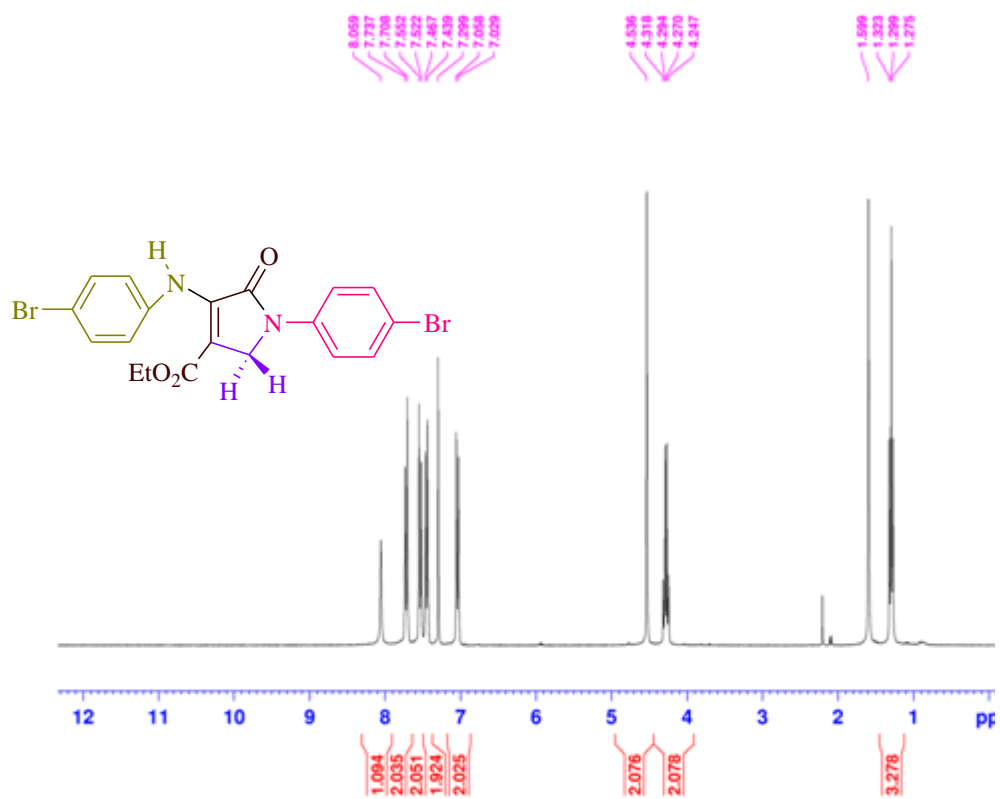

**Fig. S10**  $^1\text{H NMR}$  Spectrum of compound (300 MHz,  $\text{CDCl}_3$ ) of **5j**



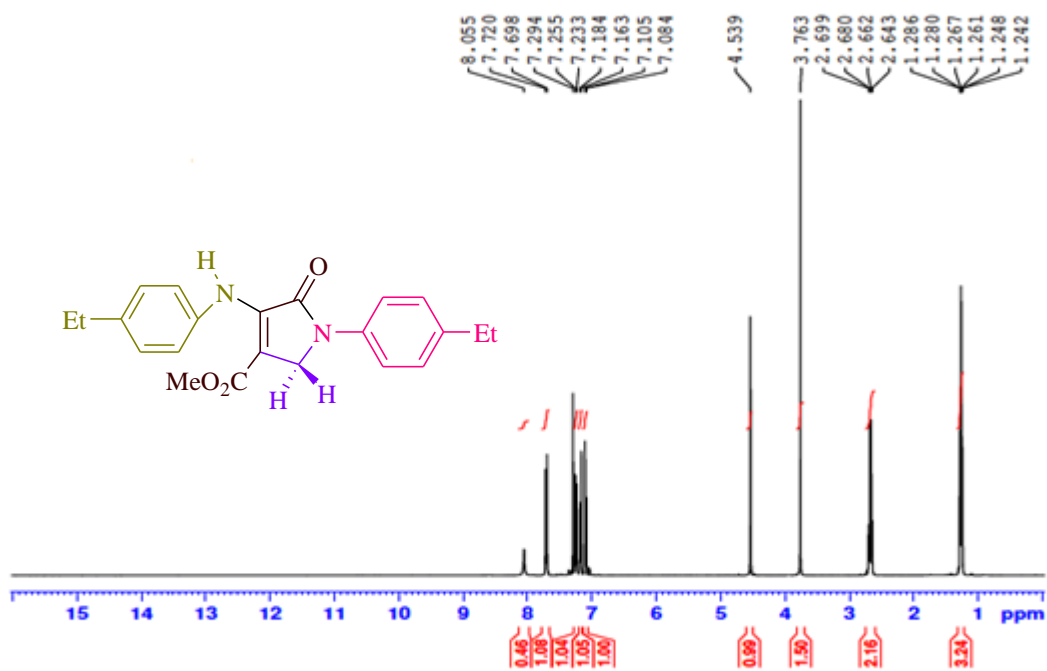

**Fig. S11** <sup>1</sup>H NMR Spectrum of compound (400 MHz, CDCl<sub>3</sub>) of **5k**

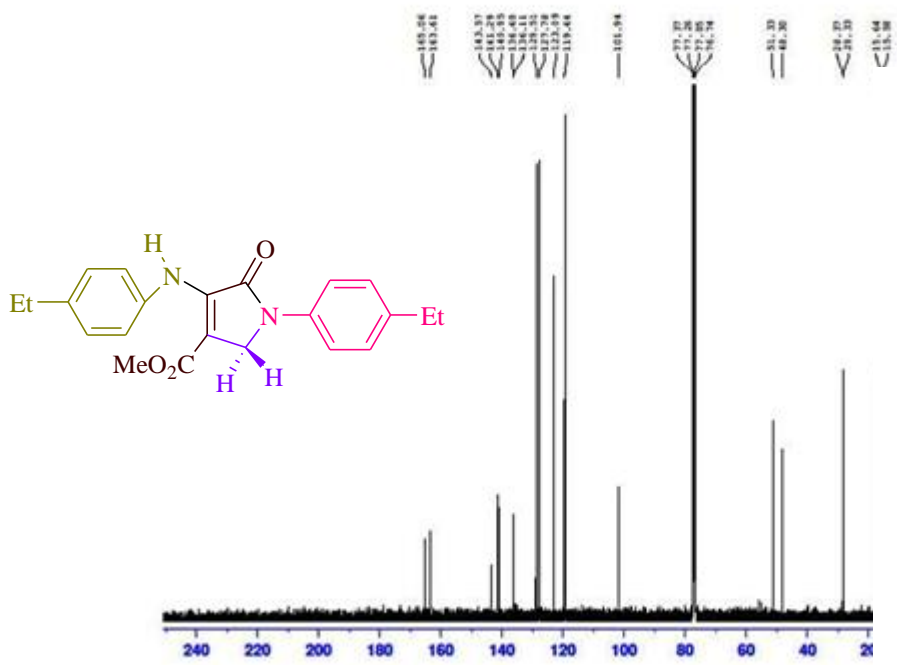

**Fig. S12**  $^{13}\text{C}$ NMR Spectrum of compound (100 MHz,  $\text{CDCl}_3$ ) of **5k**

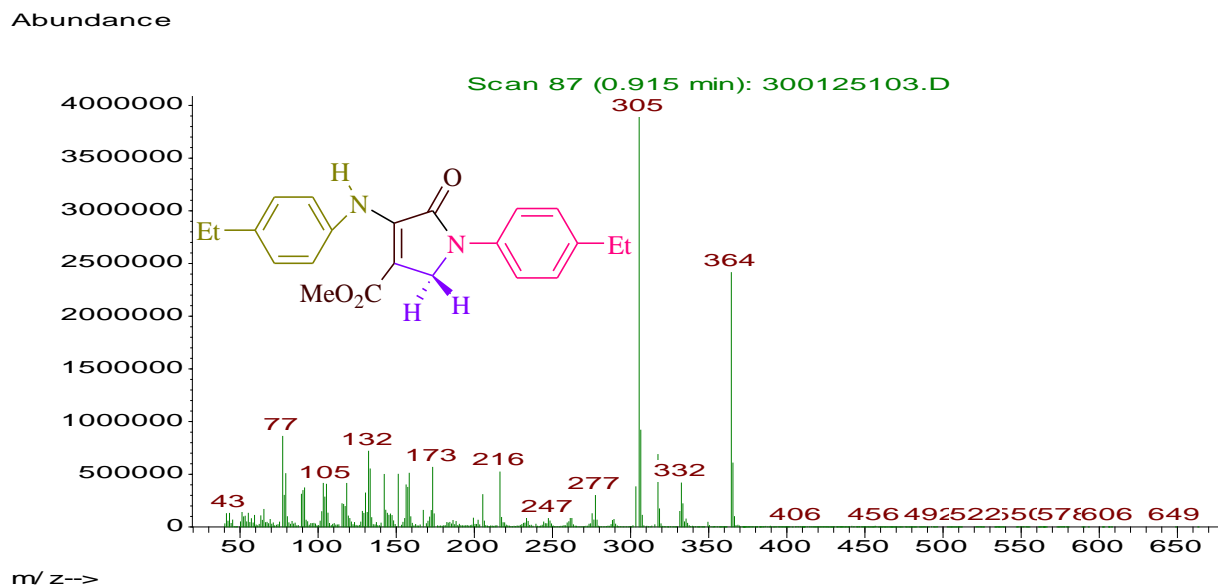

**Fig. S13** Mass spectrum of compound **5k**

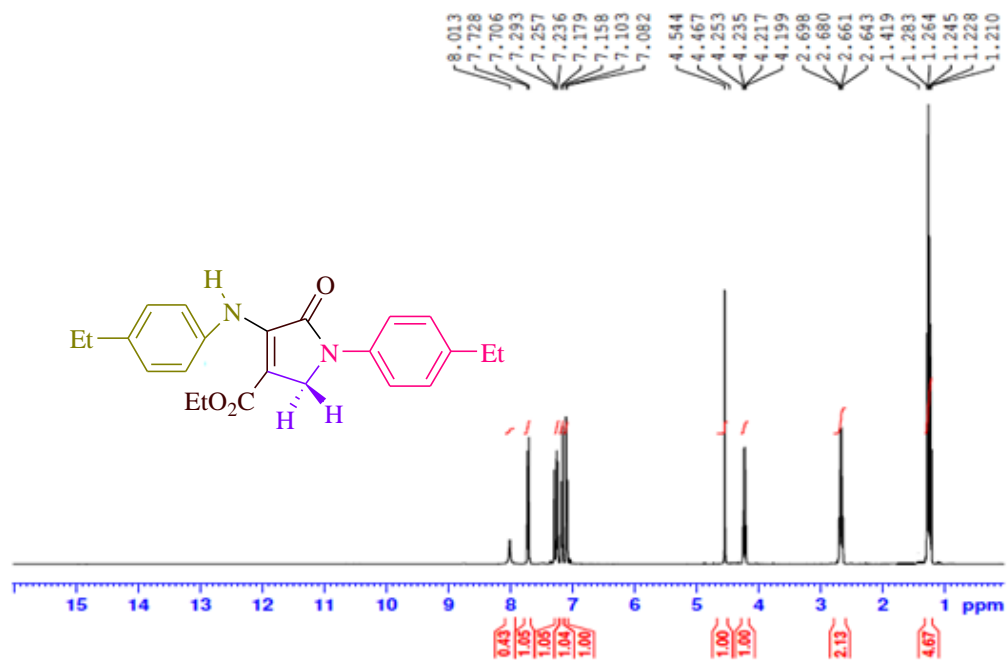

**Fig. S14** <sup>1</sup>H NMR Spectrum of compound (400 MHz, CDCl<sub>3</sub>) of **51**

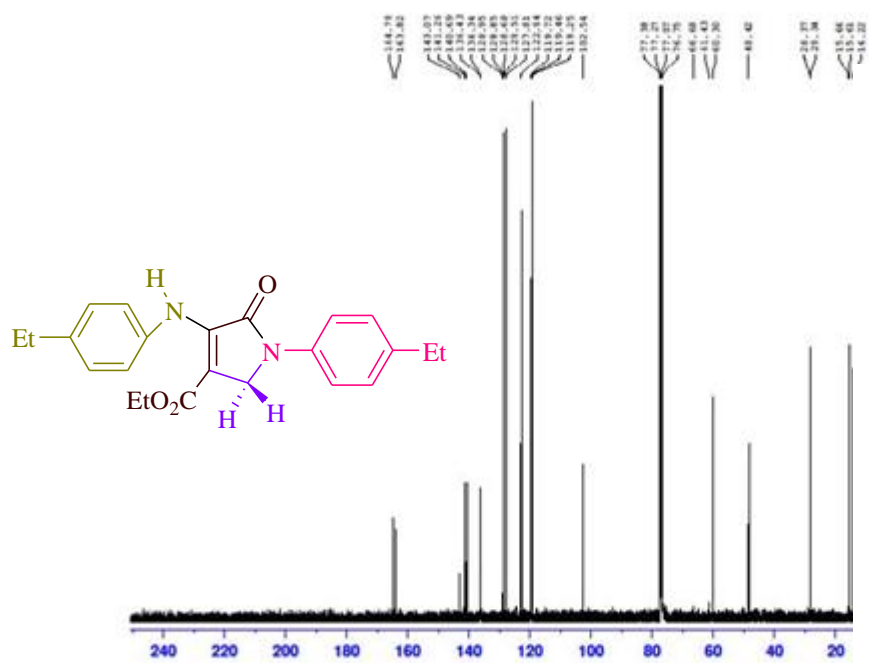

**Fig. S15** <sup>13</sup>CNMR Spectrum of compound (100 MHz, CDCl<sub>3</sub>) of **51**

Abundance

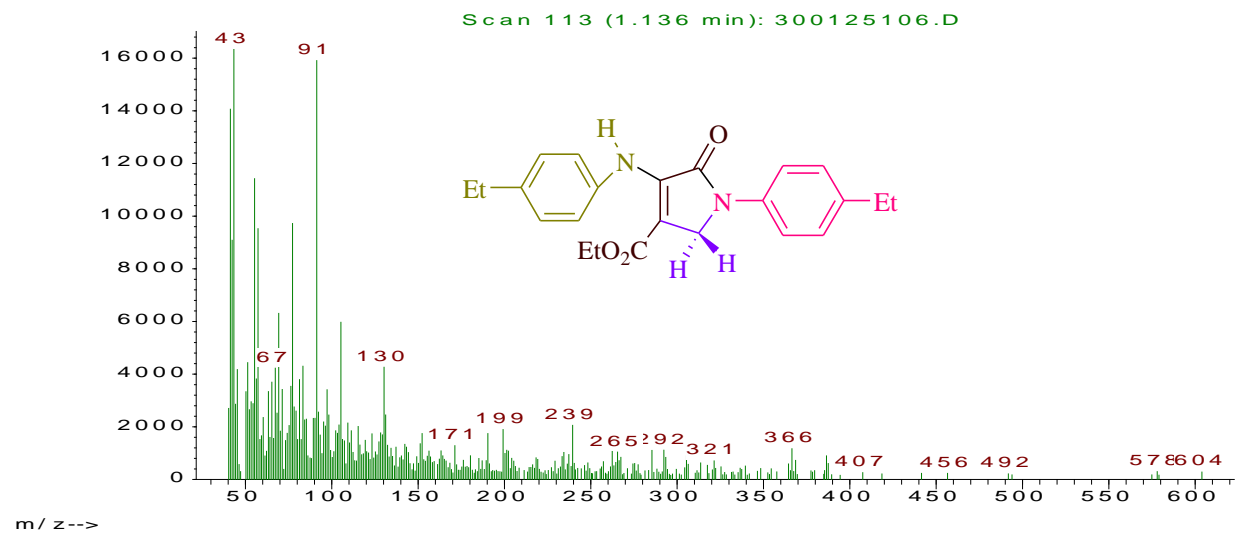

**Fig. S16** Mass spectrum of compound **51**

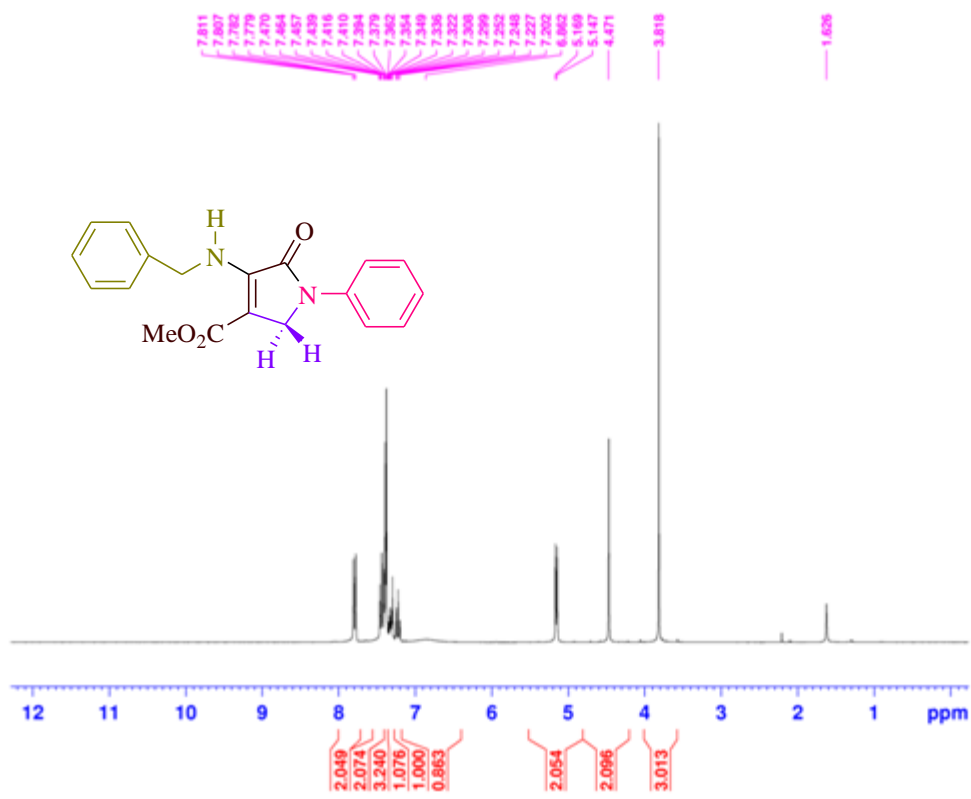

**Fig. S17** <sup>1</sup>H NMR Spectrum of compound (300 MHz, CDCl<sub>3</sub>) of **5m**

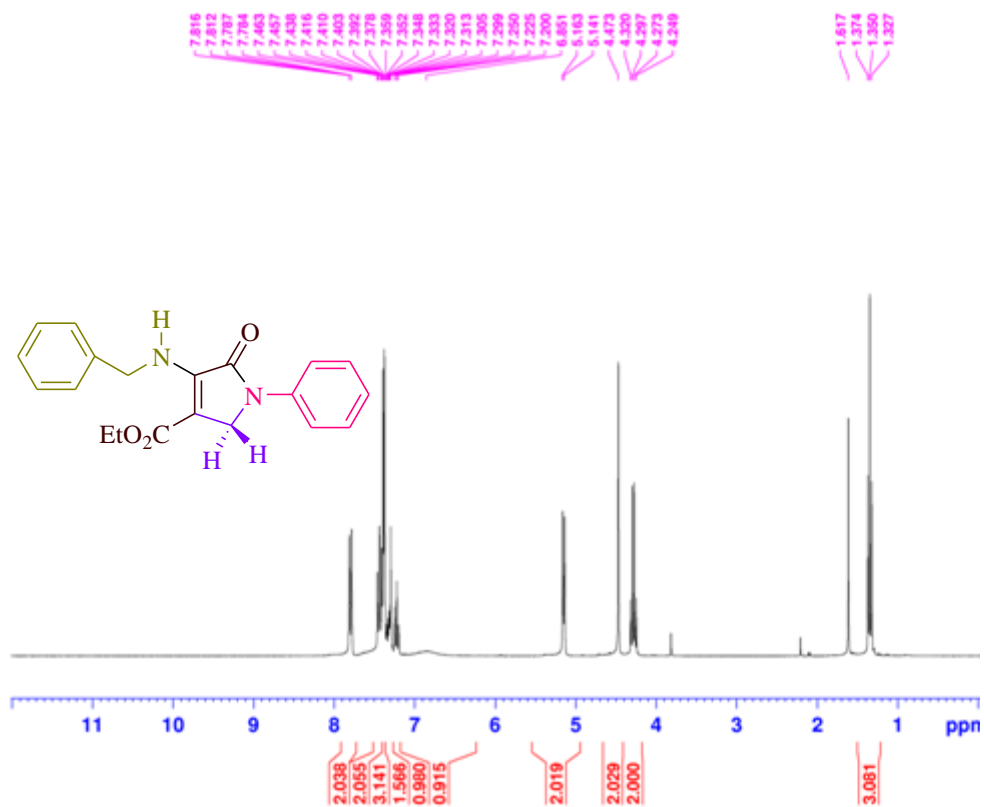

**Fig. S18** <sup>1</sup>H NMR Spectrum of compound (300 MHz, CDCl<sub>3</sub>) of **5n**



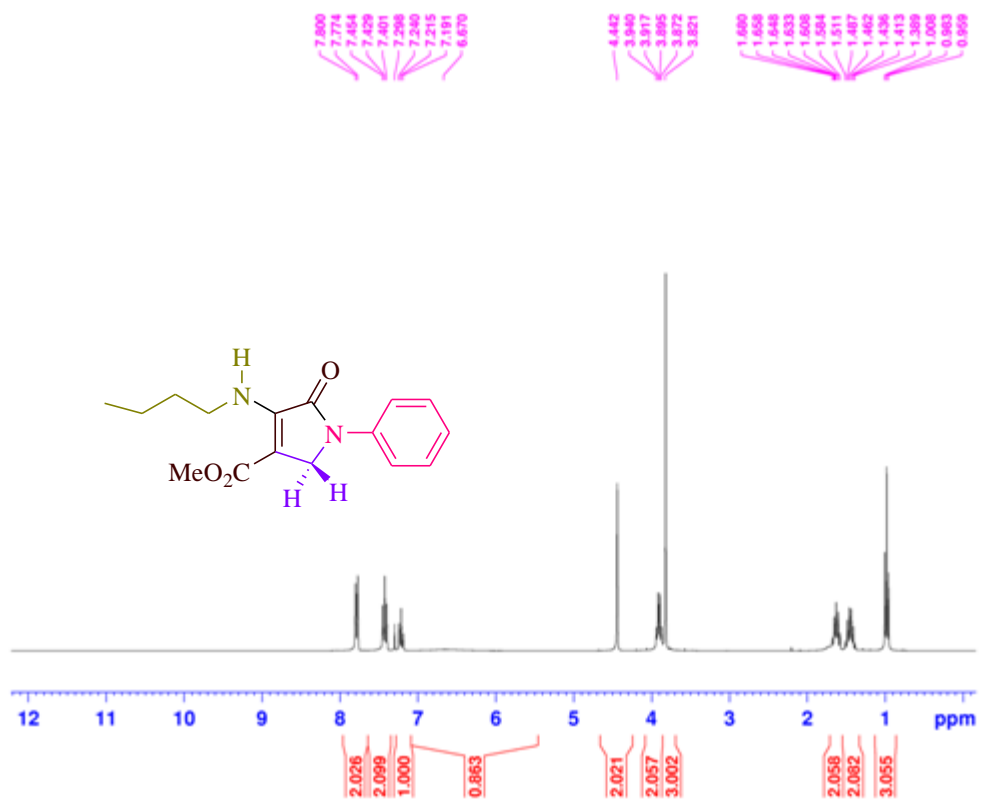

**Fig. S19** <sup>1</sup>H NMR Spectrum of compound (300 MHz, CDCl<sub>3</sub>) of **5o**

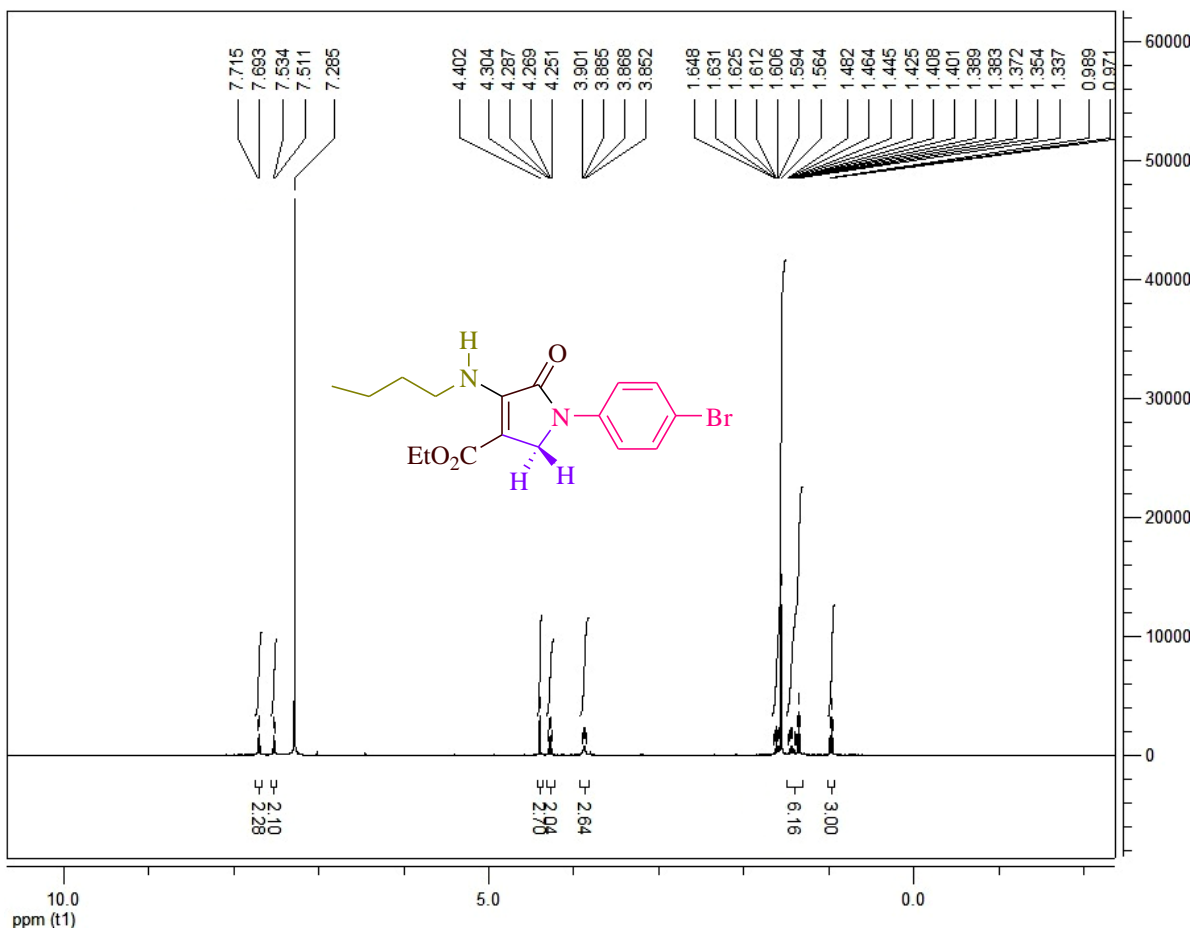

**Fig. S20**  $^1\text{H NMR}$  Spectrum of compound (400 MHz,  $\text{CDCl}_3$ ) of **5p**

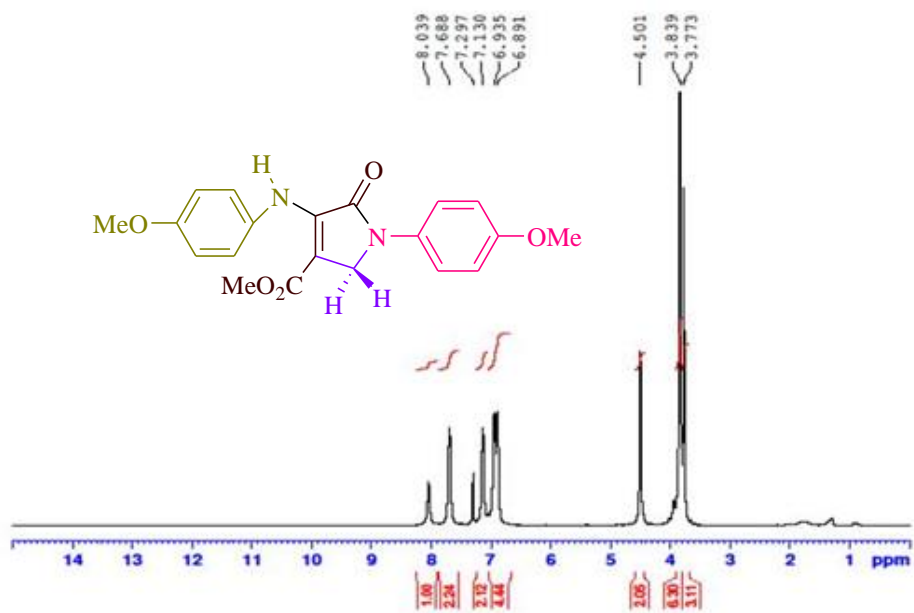

**Fig. S21**  $^1\text{H}$ NMR Spectrum of compound (400 MHz,  $\text{CDCl}_3$ ) of **5q**

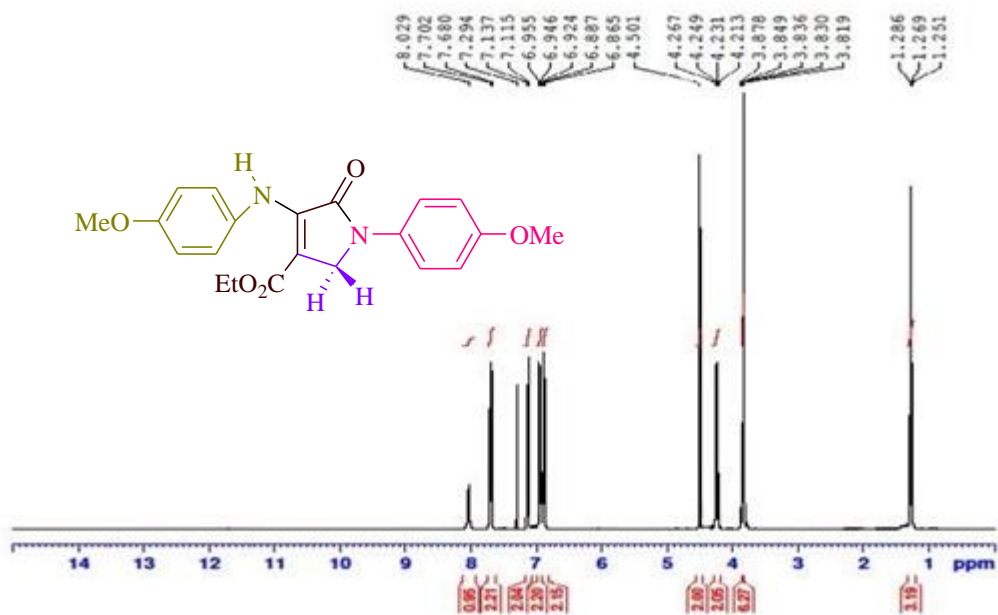

**Fig. S22** <sup>1</sup>H NMR Spectrum of compound (400 MHz, CDCl<sub>3</sub>) of **5r**

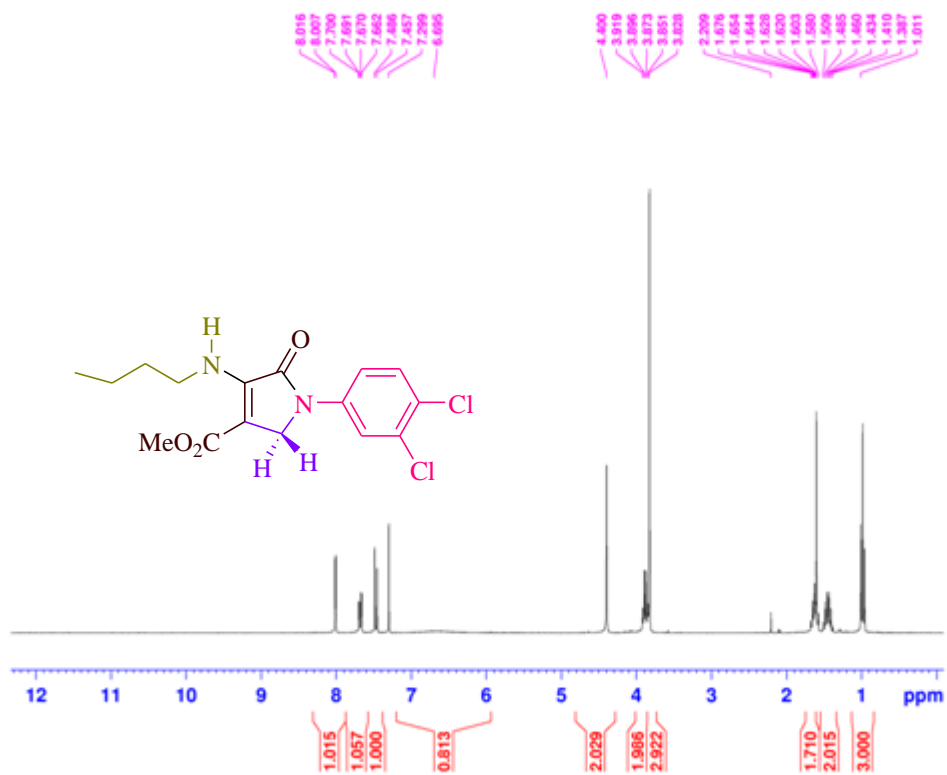

**Fig. S23** <sup>1</sup>H NMR Spectrum of compound (300 MHz, CDCl<sub>3</sub>) of **5s**
